# Supplementary material
Source: Springer Nature journal article supplement (https://www.springermedizin.de/resource/supplementary/13550_2013_112_MOESM8_ESM.pdf/9687612)

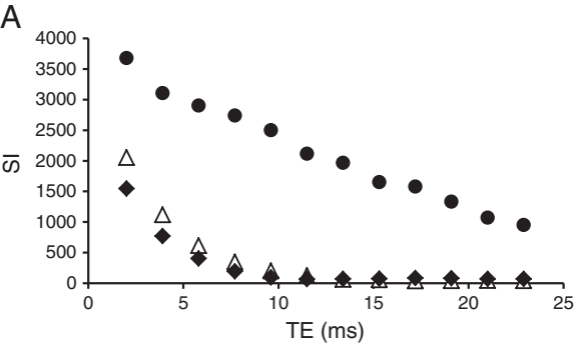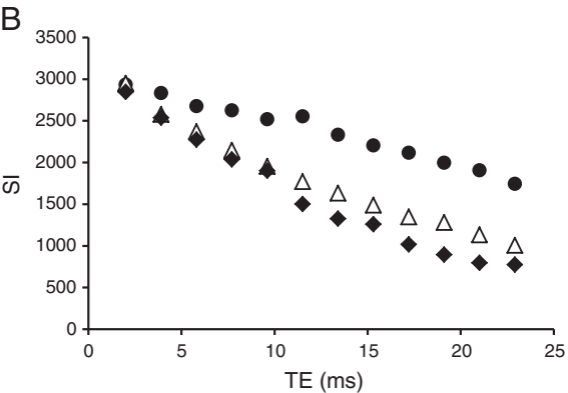

Supplement: MOESM8 [file 9687612]
